CORRECTION

# Correction: Go big or go home: A model-based assessment of general strategies to slow the spread of forest pests via infested firewood

Peter C. Jentsch, Chris T. Bauch, Denys Yemshanov, Madhur Anand

In Fig 4 the inset plot is missing. Please see the correct Fig 4 here.

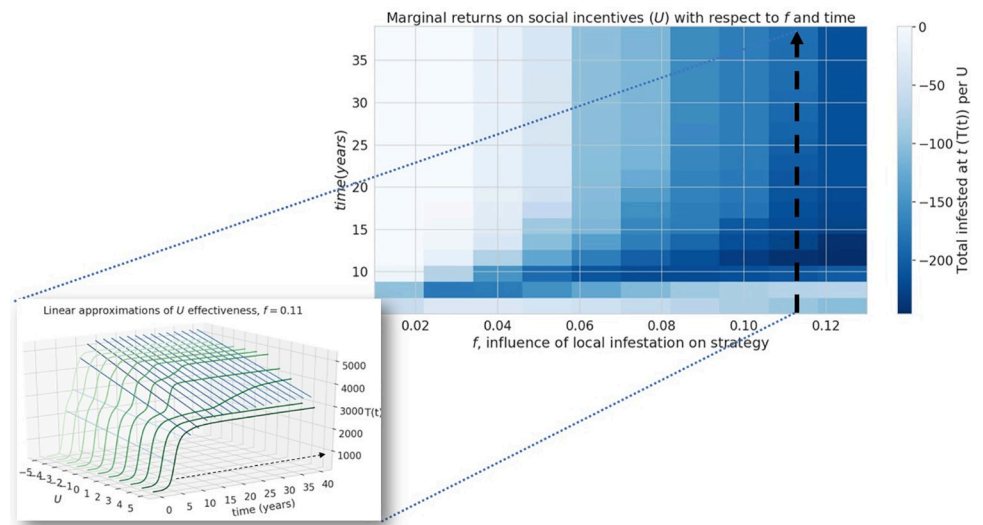

**Fig 4. Efficacy of social incentives on infestation after time  $T$ .** Inset graph shows an example of cross-section along the line  $f = 0.11$ . The influence of infestation on transport strategy,  $f$ , can hinder the intervention by public outreach, in the long-term (after approximately 20 years). The inset figure illustrates how one column in the heat map, shown by the dotted line, is constructed from the slopes of linear approximations of  $T(t)$  over  $U \in [-5, 5]$ . The blueness of the lines going left to right is a function of their slope, corresponding to the color of the cells in the heatmap.

<https://doi.org/10.1371/journal.pone.0261425.g001>

## Reference

1. Jentsch PC, Bauch CT, Yemshanov D, Anand M (2020) Go big or go home: A model-based assessment of general strategies to slow the spread of forest pests via infested firewood. PLoS ONE 15(9): e0238979. <https://doi.org/10.1371/journal.pone.0238979> PMID: 32931513

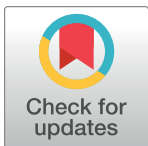

## OPEN ACCESS

**Citation:** Jentsch PC, Bauch CT, Yemshanov D, Anand M (2021) Correction: Go big or go home: A model-based assessment of general strategies to slow the spread of forest pests via infested firewood. PLoS ONE 16(12): e0261425. <https://doi.org/10.1371/journal.pone.0261425>

**Published:** December 9, 2021

**Copyright:** © 2021 Jentsch et al. This is an open access article distributed under the terms of the [Creative Commons Attribution License](https://creativecommons.org/licenses/by/4.0/), which permits unrestricted use, distribution, and reproduction in any medium, provided the original author and source are credited.
